# Supplementary material
Source: PubMed Central journal article supplement (PMC2667973)
Supplement: mmc1.pdf [file mmc1.pdf]

## Supplemental Data

### Duplications Involving a Conserved Regulatory Element

### Downstream of *BMP2* Are Associated

### with Brachydactyly Type A2

Katarina Dathe, Klaus W. Kjaer, Anja Brehm, Peter Meinecke, Peter Nürnberg, C.G. Neto, Decio Brunoni, Nils Tommerup, Claus E. Ott, Eva Klopocki, Petra Seemann, and Stefen Mundlos

**Table S1. Primer Information**

| Primer                                                                            | Primer Sequence (5'-3')  |                             | Amplicon position on chr. 20 [bp] |           |
|-----------------------------------------------------------------------------------|--------------------------|-----------------------------|-----------------------------------|-----------|
|                                                                                   | Forward                  | Reverse                     | Start                             | Stop      |
| P1                                                                                | TGGTAATCCAAACCAGAGGAA    | CCACTTAAAATTCAGAGGTAAGTAGCA | 6,807,799                         | 6,807,870 |
| P2                                                                                | ATGAACCATGGAGCGTTTC      | AAACCCAGCCTGACTTTCTG        | 6,809,794                         | 6,809,888 |
| P3                                                                                | GATGCTGTTGAGGGTGTCCA     | ACAGAGCACATCGCCCTGTT        | 6,811,685                         | 6,811,770 |
| P4                                                                                | CAGCTCATTGAACTTATCTGAACT | AAGCCTTTCTTGAGCCACAC        | 6,812,767                         | 6,812,863 |
| P5                                                                                | TGAAGATCTGAAGTGGCTGTTCTG | CTGATGTTGAAGTTACCTGCCAATT   | 6,814,403                         | 6,814,488 |
| Primer Sequence (5'-3') for amplification and sequencing of the junction fragment |                          |                             | Primer position on chr. 20 [bp]   |           |
| P6                                                                                | GAGAAAGTAAAGTTGTTTGATG   |                             | 6,813,701                         | 6,813,722 |
| P6                                                                                |                          | GTGCAACTGTATAGCCTAT         | 6,808,654                         | 6,808,672 |

Amplicons used to confirm the duplicated region by quantitative real-time PCR (P1-P5) and primers for sequencing of the junction fragment (P6 Forward 6,813,701-6,813,722, P6 Reverse 6,808,654-6,808,672). Nucleotide positions corresponding to Ensembl release 50, July 2008.
